# Supplementary material for: Cross-sectional and longitudinal assessment of the upper cervical spinal cord in motor neuron disease
Source: PubMed Central journal article supplement — Neuroimage Clin. 2019 Aug 16;24:101984. doi: 10.1016/j.nicl.2019.101984 (PMC6734179; doi:10.1016/j.nicl.2019.101984), 2019-08-16
Supplement: mmc1.pdf [file mmc1.pdf]

## SUPPLEMENTARY DATA

### **Cross-sectional and longitudinal assessment of the upper cervical spinal cord in motor neuron disease**

Hannelore K. van der Burgh<sup>a</sup>, Henk-Jan Westeneng<sup>a</sup>, Jil M. Meier<sup>a</sup>, Michael A. van Es<sup>a</sup>, Jan H. Veldink<sup>a</sup>, Jeroen Hendrikse<sup>b</sup>, Martijn P. van den Heuvel<sup>\*c</sup>, Leonard H. van den Berg<sup>\*a</sup>

#### **Affiliations**

a. Department of Neurology, UMC Utrecht Brain Center, University Medical Center Utrecht, Utrecht, The Netherlands

b. Department of Radiology, UMC Utrecht Brain Center, University Medical Center Utrecht, Utrecht, The Netherlands.

c. Department of Complex Trait Genetics, Center for Neurogenomics and Cognitive Research, VU University Amsterdam, Amsterdam, The Netherlands.

\* authors contributed equally

## Supplementary Figures

Figure S1: CSA at baseline stratified for availability of follow-up data for ALS C9- patients.

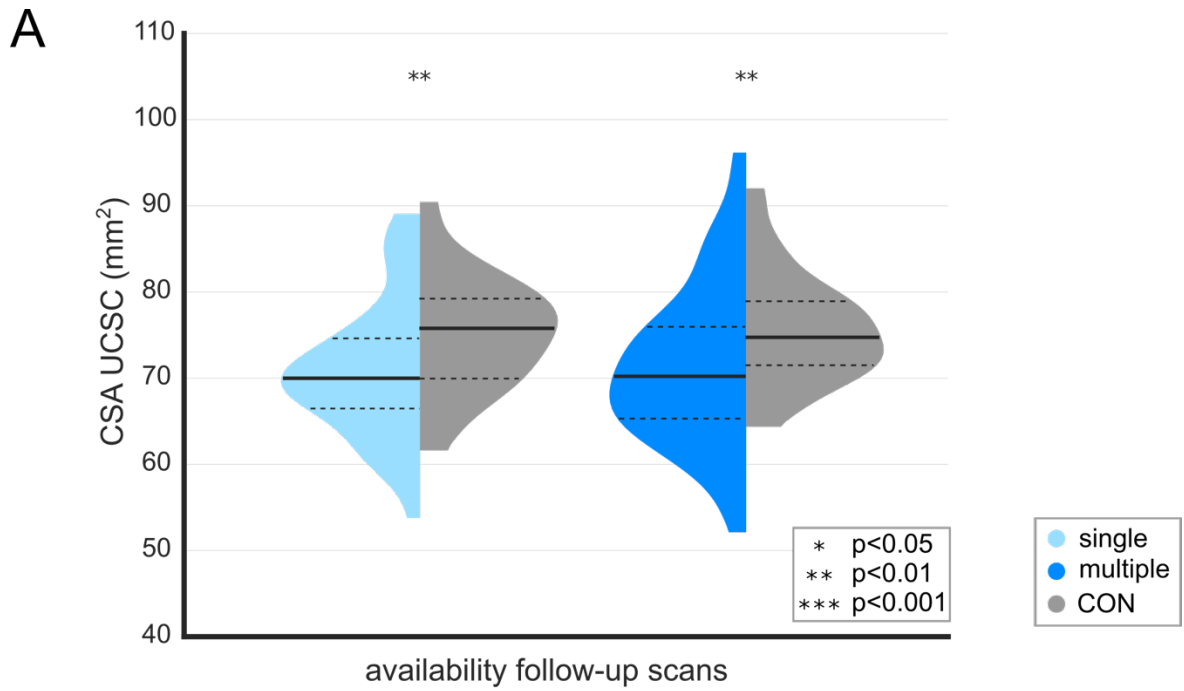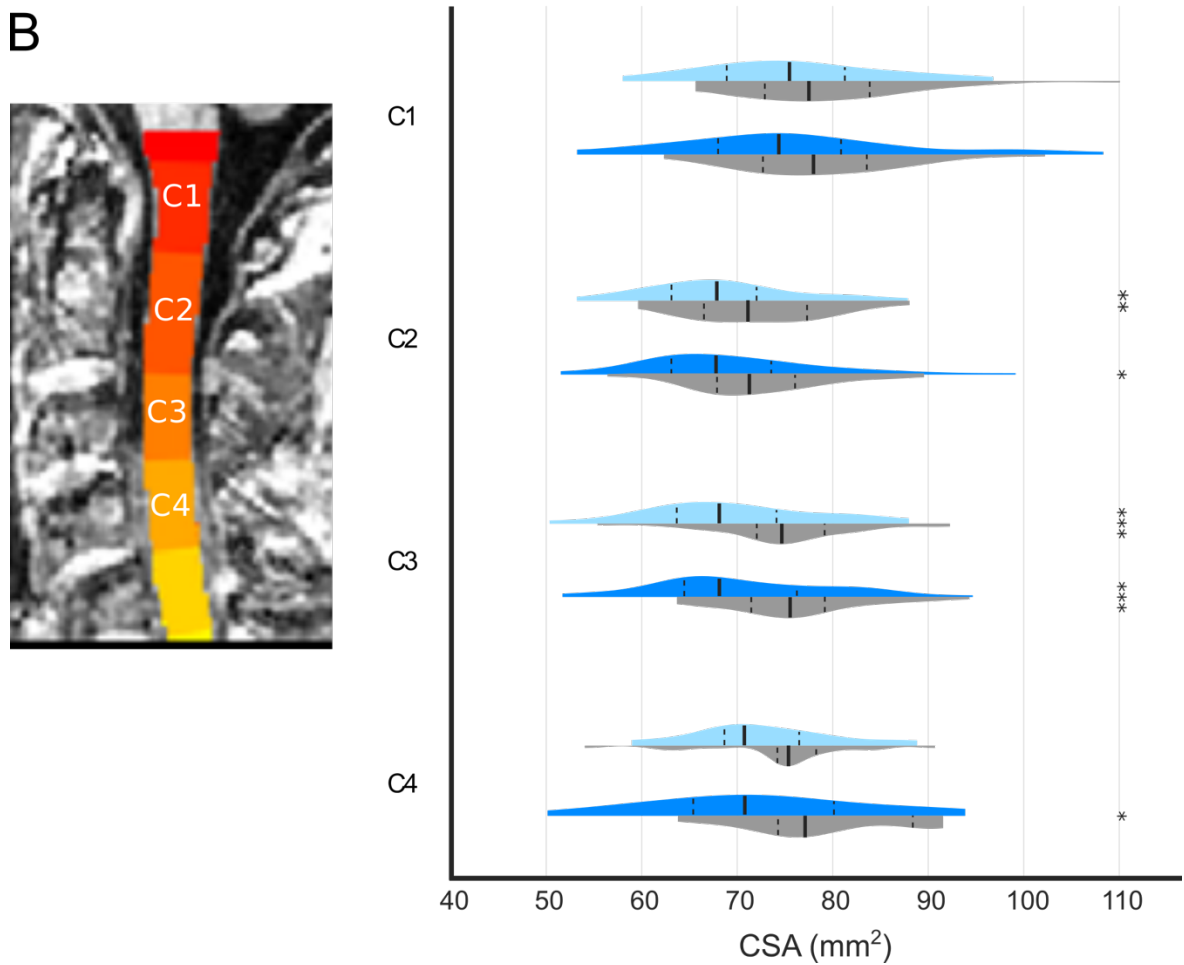

Figure S2: Sagittal view of three brain MRI's as example for image quality necessary for upper cervical spinal cord examination.

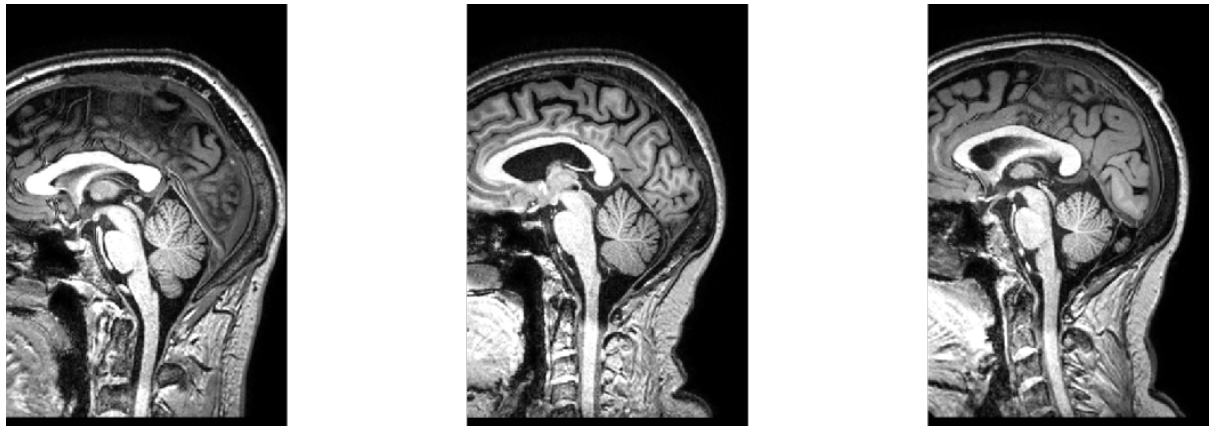

Figure S3: Longitudinal change in CSA for each control group, as reported in the main text.

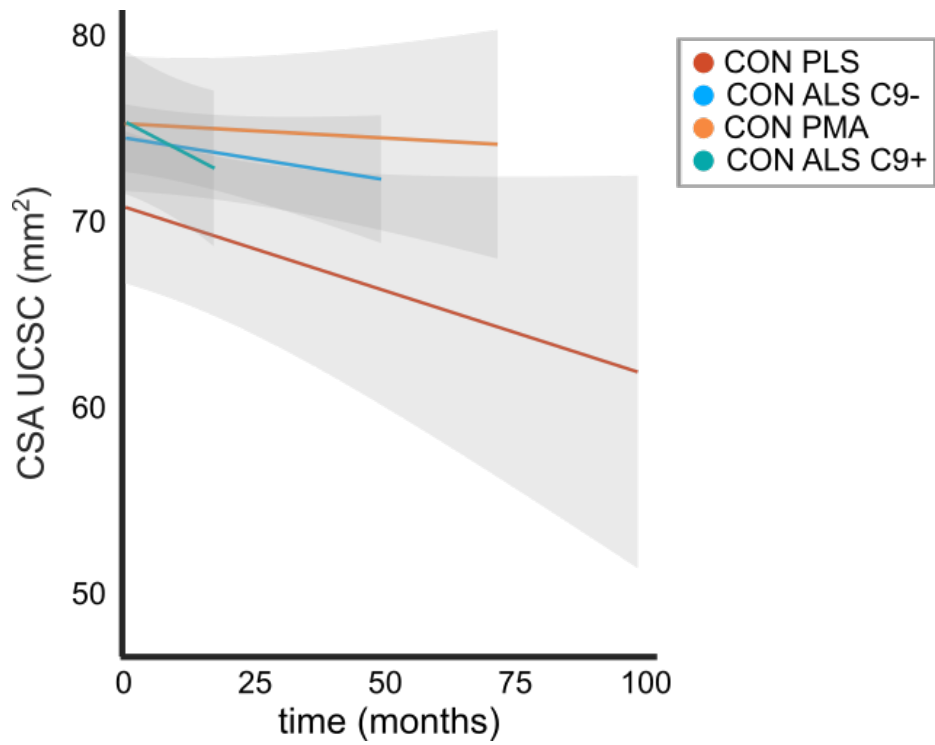

## Supplementary Tables

Table S1: Demographic and clinical characteristics of ALS C9- patients at baseline stratified for availability of follow-up data.

|                                                     | Single scan        | Multiple scans     |
|-----------------------------------------------------|--------------------|--------------------|
| <b>n</b>                                            | 44                 | 64                 |
| <b>Gender (%)</b>                                   |                    |                    |
| <b>Male</b>                                         | 27 (61.4)          | 32 (50.0)          |
| <b>Female</b>                                       | 17 (38.6)          | 32 (50.0)          |
| <b>Age at 1<sup>st</sup> MRI (median, range)</b>    | 68.7 (51.0 – 78.5) | 62.4 (30.6 – 80.6) |
| <b>Site of onset (%)</b>                            |                    |                    |
| <b>Bulbar</b>                                       | 14 (31.8)          | 16 (25.0)          |
| <b>Spinal</b>                                       | 30 (68.2)          | 48 (75.0)          |
| <b>Disease duration<sup>a</sup> (median, range)</b> | 12.5 (2.9 – 58.1)  | 14.4 (3.9 – 174.4) |
| <b>Type (%)</b>                                     |                    |                    |
| <b>Sporadic</b>                                     | 44 (100)           | 64 (100)           |
| <b>Familial</b>                                     | 0 (0.0)            | 0 (0.0)            |
| <b>ALSFRS-R score (median, range)</b>               | 38 (23 – 46)       | 41 (26 – 47)       |

<sup>a</sup> Disease duration was measured from disease onset until date of the first MRI in months.

Table S2: Mean age and gender for the patient groups and their matched controls.

|                    | <b>n</b> | <b>Age at 1<sup>st</sup> MRI</b> | <b>Gender</b>   |                   |
|--------------------|----------|----------------------------------|-----------------|-------------------|
|                    |          | <b>Mean (range)</b>              | <b>Male (%)</b> | <b>Female (%)</b> |
| <b>ALS C9-</b>     | 108      | 63.1 (30.6-80.6)                 | 59 (54.6)       | 49 (45.4)         |
| <b>CON ALS C9-</b> | 108      | 63.8 (30.9-79.4)                 | 59 (54.6)       | 49 (45.4)         |
| <b>ALS C9+</b>     | 26       | 57.7 (40.6-67.0)                 | 17 (65.4)       | 9 (34.6)          |
| <b>CON ALS C9+</b> | 26       | 57.8 (38.7-67.1)                 | 17 (65.4)       | 9 (34.6)          |
| <b>PLS</b>         | 28       | 61.7 (36.1-78.3)                 | 17 (60.7)       | 11 (39.3)         |
| <b>CON PLS</b>     | 28       | 62.0 (39.9-78.3)                 | 17 (60.7)       | 11 (39.3)         |
| <b>PMA</b>         | 56       | 63.4 (22.6-80.1)                 | 46 (82.1)       | 10 (17.9)         |
| <b>CON PMA</b>     | 56       | 63.6 (30.9-78.4)                 | 46 (82.1)       | 10 (17.9)         |

Table S3. Distribution of scan visits.

|               | <b>ALS C9-</b> | <b>ALS C9+</b> | <b>PLS</b> | <b>PMA</b> | <b>CON</b> |
|---------------|----------------|----------------|------------|------------|------------|
| Baseline scan | 108            | 26             | 28         | 56         | 114        |
| Scan 2        | 58             | 17             | 17         | 40         | 54         |
| Scan 3        | 33             | 6              | 15         | 25         | -          |
| Scan 4        | 23             | 5              | 10         | 18         | -          |
| Scan 5        | 13             | 4              | 10         | 17         | -          |

Table S4: Demographics and clinical characteristics of study participants classified according to cervical spinal cord segment measured.

|                                                         | ALS C9-             | ALS C9+               | PLS                   | PMA                   | CON                 |
|---------------------------------------------------------|---------------------|-----------------------|-----------------------|-----------------------|---------------------|
| <b>C1 (n (%))</b>                                       | 108 (100)           | 26 (100)              | 28 (100)              | 56 (100)              | 114 (100)           |
| <b>Age at first MRI</b>                                 | 64.6<br>(30.6-80.6) | 59.7<br>(40.6 – 67.0) | 60.2<br>(36.1 – 78.3) | 63.1<br>(22.6 – 80.1) | 65.0<br>(30.8-79.4) |
| <b>Sex (male/female)</b>                                | 59 / 49             | 17 / 9                | 17 / 11               | 46 / 10               | 63 / 51             |
| <b>Site of onset<br/>(bulbar/spinal)</b>                | 30 / 78             | 5 / 21                | 3 / 25                | 0 / 56                | -                   |
| <b>Disease duration<sup>a</sup><br/>(median, range)</b> | 14.4<br>(2.9-174.4) | 11.5<br>(3.3-68.3)    | 90.6<br>(23.5-224.9)  | 20.3<br>(4.6-467.4)   | -                   |
| <b>C2 (n (%))</b>                                       | 108 (100)           | 26 (100)              | 28 (100)              | 58 (100)              | 114 (100)           |
| <b>Age at first MRI</b>                                 | 64.6<br>(30.6-80.6) | 59.7<br>(40.6 – 67.0) | 60.2<br>(36.1 – 78.3) | 63.1<br>(22.6 – 80.1) | 65.0<br>(30.8-79.4) |
| <b>Sex (male/female)</b>                                | 59 / 49             | 17 / 9                | 17 / 11               | 46 / 10               | 63 / 51             |
| <b>Site of onset<br/>(bulbar/spinal)</b>                | 30 / 78             | 5 / 21                | 3 / 25                | 0 / 56                | -                   |
| <b>Disease duration<sup>a</sup><br/>(median, range)</b> | 14.4<br>(2.9-174.4) | 11.5<br>(3.3-68.3)    | 90.6<br>(23.5-224.9)  | 20.3<br>(4.6-467.4)   | -                   |
| <b>C3 (n (%))</b>                                       | 108 (100)           | 21 (80.8)             | 21 (75.0)             | 48 (85.7)             | 114 (100)           |
| <b>Age at first MRI</b>                                 | 64.6<br>(30.6-80.6) | 62.2<br>(40.6 – 67.0) | 60.2<br>(36.1 – 75.0) | 63.8<br>(46.4 – 80.1) | 65.0<br>(30.8-79.4) |
| <b>Sex (male/female)</b>                                | 59 / 49             | 12 / 9                | 10 / 11               | 38 / 10               | 63 / 51             |
| <b>Site of onset<br/>(bulbar/spinal)</b>                | 30 / 78             | 5 / 16                | 2 / 19                | 0 / 48                | -                   |
| <b>Disease duration<sup>a</sup><br/>(median, range)</b> | 14.4<br>(2.9-174.4) | 11.5<br>(3.3-68.3)    | 78.8<br>(23.5-224.9)  | 21.7<br>(4.6-467.4)   | -                   |
| <b>C4 (n (%))</b>                                       | 49 (43.4)           | 7 (26.9)              | 8 (28.6)              | 18 (32.1)             | 49 (43.0)           |
| <b>Age at first MRI</b>                                 | 67.3<br>(46.4-80.6) | 63.1<br>(48.0 – 66.6) | 67.8<br>(36.1 – 75.0) | 70.2<br>(49.4 – 80.1) | 67.0<br>(45.0-79.4) |
| <b>Sex (male/female)</b>                                | 19 / 30             | 2 / 5                 | 3 / 5                 | 11 / 7                | 20 / 29             |
| <b>Site of onset<br/>(bulbar/spinal)</b>                | 15 / 34             | 2 / 5                 | 0 / 8                 | 0 / 18                | -                   |
| <b>Disease duration<sup>a</sup><br/>(median, range)</b> | 14.1<br>(4.6-174.4) | 14.2<br>(6.0-21.2)    | 82.2<br>(37.1-214.2)  | 26.5<br>(9.4-467.4)   | -                   |

<sup>a</sup> Disease duration was measured from disease onset until date of the first MRI in months.

Table S5 Baseline CSA of the average over segments C2 and C3.

|         | CSA              | CSA              | $\Delta$ CSA | p-value | FDR-corrected |
|---------|------------------|------------------|--------------|---------|---------------|
|         | PAT              | CON              |              |         | p-value       |
| ALS C9- | 69.12 $\pm$ 7.35 | 74.14 $\pm$ 7.35 | 5.02         | <0.001  | <0.001        |
| ALS C9+ | 71.58 $\pm$ 6.79 | 76.40 $\pm$ 7.12 | 4.76         | 0.019   | 0.028         |
| PLS     | 65.81 $\pm$ 6.76 | 72.45 $\pm$ 6.85 | 6.64         | 0.002   | 0.006         |
| PMA     | 70.29 $\pm$ 8.50 | 74.88 $\pm$ 8.86 | 4.60         | 0.002   | 0.008         |

Table S6 Longitudinal CSA of the average over segments C2 and C3.

|         | $\Delta$ CSA | p-value | FDR-corrected |
|---------|--------------|---------|---------------|
|         |              |         | p-value       |
| ALS C9- | 0.005        | 0.004   | <b>0.044</b>  |
| ALS C9+ | 0.002        | 0.703   | 0.999         |
| PLS     | <0.001       | 0.998   | 0.999         |
| PMA     | 0.002        | 0.217   | 0.434         |

Table S7 Baseline correlations between CSA and ALSFRS-R scores.

|                                  |             | ALS C9-   | ALS C9+  | PLS             | PMA       |
|----------------------------------|-------------|-----------|----------|-----------------|-----------|
| <b>Total ALSFRS-R</b>            | <b>UCSC</b> | r=0.098,  | r=0.226, | <b>r=0.557,</b> | r=-0.168, |
|                                  |             | p=0.315   | p=0.324  | <b>p=0.009</b>  | p=0.258   |
|                                  | <b>C1</b>   | r=0.040,  | r=0.199, | <b>r=0.547,</b> | r=-0.193, |
|                                  |             | p=0.686   | p=0.329  | <b>p=0.003</b>  | p=0.157   |
|                                  | <b>C2</b>   | r=0.112,  | r=0.212, | <b>r=0.541,</b> | r=-0.211, |
|                                  |             | p=0.252   | p=0.298  | <b>p=0.003</b>  | p=0.122   |
|                                  | <b>C3</b>   | r=0.114,  | r=0.247, | <b>r=0.463,</b> | r=-0.081, |
|                                  |             | p=0.243   | p=0.279  | <b>p=0.034</b>  | p=0.589   |
| <b>C4</b>                        | r=0.155,    | r=-0.322, | r=0.349, | r=0.239,        |           |
|                                  | p=0.286     | p=0.482   | p=0.396  | p=0.356         |           |
| <b>Spinal ALSFRS-R sub-score</b> | <b>UCSC</b> | r=0.024,  | r=0.249, | <b>r=0.558,</b> | r=-0.127, |
|                                  |             | p=0.807   | p=0.276  | <b>p=0.009</b>  | p=0.393   |
|                                  | <b>C1</b>   | r=-0.002, | r=0.214, | <b>r=0.525,</b> | r=-0.196, |
|                                  |             | p=0.981   | p=0.294  | <b>p=0.004</b>  | p=0.151   |
|                                  | <b>C2</b>   | r=0.026,  | r=0.263, | <b>r=0.491,</b> | r=-0.184, |
|                                  |             | p=0.791   | p=0.193  | <b>p=0.008</b>  | p=0.179   |
|                                  | <b>C3</b>   | r=0.031,  | r=0.295, | <b>r=0.466,</b> | r=-0.032, |
|                                  |             | p=0.755   | p=0.194  | <b>p=0.033</b>  | p=0.832   |
| <b>C4</b>                        | r=0.073,    | r=-0.334, | r=0.471, | r=0.358,        |           |
|                                  | p=0.618     | p=0.465   | p=0.238  | p=0.158         |           |

bold p-values denote significance.

Table S8 Longitudinal correlations between CSA of UCSC and ALSFRS-R scores.

|                                  | ALS C9-           | ALS C9+  | PLS               | PMA              |
|----------------------------------|-------------------|----------|-------------------|------------------|
| <b>Total ALSFRS-R</b>            | <b>r=0.318,</b>   | r=0.316, | <b>r=0.677,</b>   | <b>r=0.233,</b>  |
|                                  | <b>p&lt;0.001</b> | p=0.134  | <b>p&lt;0.001</b> | <b>p=0.016</b>   |
| <b>Spinal ALSFRS-R sub-score</b> | <b>r=0.375,</b>   | r=0.374, | <b>r=0.784,</b>   | <b>r=-0.254,</b> |
|                                  | <b>p&lt;0.001</b> | p=0.097  | <b>p=0.002</b>    | <b>p=0.016</b>   |

bold p-values denote significance.



Table S9 Comparison of white matter tracts in terms of FA, RD and MD for the patient groups.

|               |    | ALS C9-          | ALS C9+      | PLS          | PMA   |
|---------------|----|------------------|--------------|--------------|-------|
| <b>fmajor</b> | FA | 0.920            | 0.562        | 0.849        | 0.451 |
|               | MD | 0.371            | 0.442        | 0.450        | 0.752 |
|               | RD | 0.672            | 0.397        | 0.686        | 0.533 |
| <b>fminor</b> | FA | 0.432            | 0.141        | 0.395        | 0.825 |
|               | MD | 0.152            | <b>0.002</b> | 0.249        | 0.309 |
|               | RD | 0.225            | <b>0.006</b> | 0.662        | 0.530 |
| <b>ATR</b>    | FA | 0.709            | 0.699        | 0.384        | 0.595 |
|               | MD | 0.307            | <b>0.004</b> | 0.864        | 0.727 |
|               | RD | 0.532            | <b>0.024</b> | 0.623        | 0.799 |
| <b>CAB</b>    | FA | 0.190            | 0.298        | 0.998        | 0.625 |
|               | MD | 0.114            | 0.626        | 0.475        | 0.713 |
|               | RD | 0.101            | 0.791        | 0.573        | 0.598 |
| <b>CCG</b>    | FA | 0.476            | 0.234        | 0.106        | 0.596 |
|               | MD | 0.136            | <b>0.030</b> | 0.324        | 0.799 |
|               | RD | 0.195            | <b>0.046</b> | 0.081        | 0.566 |
| <b>CST</b>    | FA | <b>&lt;0.001</b> | 0.245        | 0.541        | 0.585 |
|               | MD | <b>&lt;0.001</b> | <b>0.046</b> | <b>0.003</b> | 0.892 |
|               | RD | <b>&lt;0.001</b> | 0.099        | 0.071        | 0.987 |
| <b>ILF</b>    | FA | 0.438            | 0.540        | 0.473        | 0.641 |
|               | MD | 0.646            | 0.410        | 0.127        | 0.995 |
|               | RD | 0.781            | 0.340        | 0.524        | 0.917 |
| <b>SLFP</b>   | FA | 0.313            | 0.738        | 0.333        | 0.839 |
|               | MD | 0.176            | <b>0.019</b> | 0.429        | 0.927 |
|               | RD | 0.211            | 0.093        | 0.426        | 0.877 |
| <b>SLFT</b>   | FA | 0.809            | 0.481        | 0.133        | 0.560 |
|               | MD | 0.262            | 0.100        | 0.973        | 0.994 |
|               | RD | 0.447            | 0.487        | 0.440        | 0.867 |
| <b>UNC</b>    | FA | 0.080            | 0.638        | 0.796        | 0.627 |
|               | MD | 0.161            | 0.067        | 0.325        | 0.903 |
|               | RD | 0.083            | 0.184        | 0.605        | 0.761 |

fmajor = forceps major; fminor = forceps minor; ATR = anterior thalamic radiation; CAB = cingulum-angular bundle; CCG = cingulum-cingulate gyrus bundle; CST = corticospinal tract; ILF = inferior longitudinal fasciculus; SLFP = superior longitudinal fasciculus-parietal terminations; SLFT = superior longitudinal fasciculus-temporal terminations; UNC = uncinata fasciculus

bold p-values denote significance after 10,000 permutations.
